# Supplementary material
Source: PubMed Central journal article supplement (PMC4900140)
Supplement: NIHMS786741-supplement-Supplemental_Figure_1.pdf [file NIHMS786741-supplement-Supplemental_Figure_1.pdf]

Figure S1

|                           |                                           |
|---------------------------|-------------------------------------------|
|                           | *                                         |
| Homo.sapien               | EEGAVRGLYKGLSMN <sup>*</sup> WVKGPIAVGISF |
| Mus.musculus              | EEGAVRGLYKGLSMN <sup>*</sup> WVKGPIAVGISF |
| Rattus.norvegicus         | EEGAVRGLYKGLSMN <sup>*</sup> WVKGPIAVGISF |
| Gallus.gallus             | EEGLIRGLYKGLSMN <sup>*</sup> WVKGPIAVGISF |
| Boiga.irregularis         | EEGLVRGLYKGLSMN <sup>*</sup> WVKGP-----   |
| Xenopus.tropicallis       | EEGFIRGLYKGLSMN <sup>*</sup> WVKGPVAVGISF |
| Danio.rerio               | EEGIVRGLYKGLSMN <sup>*</sup> WVKGPIAVGISF |
| Schistosoma.haematobium   | DEGFIRGLYKGLSVN <sup>*</sup> WIKGPVASGISF |
| oriental.fruitfly         | -----NQYRTIIAVGISF                        |
| Schizosaccharomyces.pombe | TEG-INGFRGYSSNMLKIIPVMSITW                |
