# Supplementary material
Source: PubMed Central journal article supplement (PMC4900140)

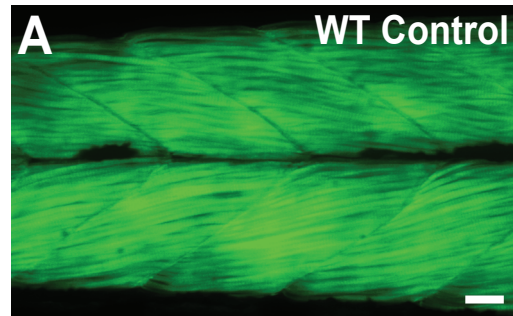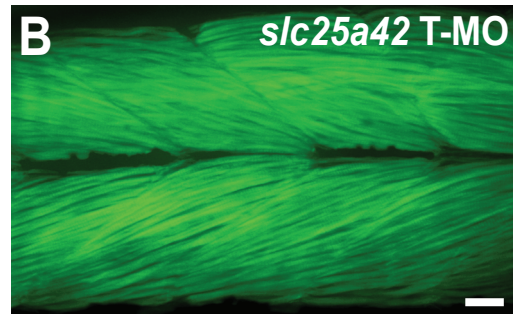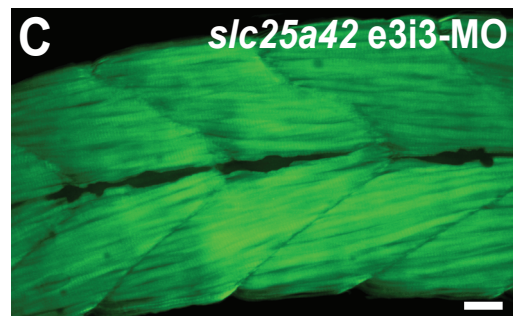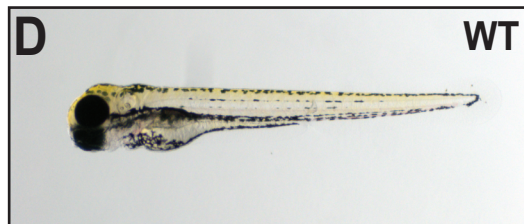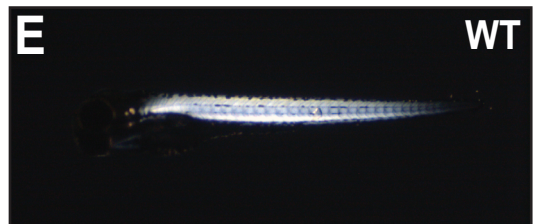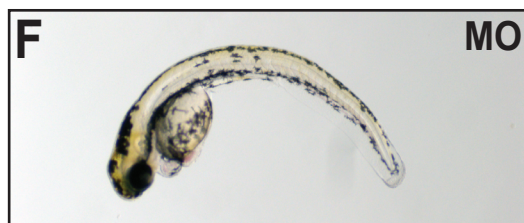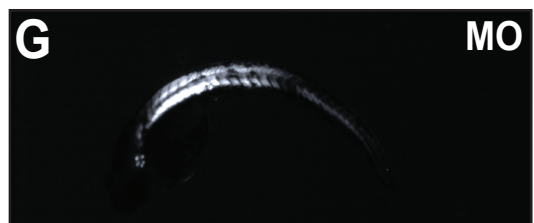

3 dpf

Supplement: NIHMS786741-supplement-Supplemental_Figure_2.pdf [file NIHMS786741-supplement-Supplemental_Figure_2.pdf]
